# Supplementary material
Source: publisher figshare collection journal article supplement (https://acs.figshare.com/ndownloader/files/6600255)
Supplement: Supplementary file 1 [file 6600255]

Compound,SMILE,IUPAC Name,HDAC1 IC50 (nM),HDAC2 IC50 (nM),HDAC3 IC50 (nM),HEK293 Lysate IC50 (nM)
1a,O=C(NNCCCC)C1=CC=C(OC)C=C1,N'-butyl-4-methoxybenzohydrazide,,,156.7 ± 28.55,727.3 ± 10.75
1b,O=C(NNCCCC)C1=CC(C=CC=C2)=C2O1,N'-butylbenzofuran-2-carbohydrazide,,,1362 ± 197.3,1688 ± 38.05
1c,O=C(NNCCCC)C1=CC=C(OC2=CC=CC=C2)C=C1,N'-butyl-4-phenoxybenzohydrazide,,,311.7 ± 42.82,1691 ± 298.3
1d,O=C(NNCCCC)C1=CN=CC=C1,N'-butylnicotinohydrazide,,,1547 ± 429.8,4676 ± 909.0
1e,O=C(NNCCCC)C1=CC=C(C2=CC=CC=C2)C=C1,"N'-butyl-[1,1'-biphenyl]-4-carbohydrazide",,,68.85 ± 9.39,1307 ± 210.0
1f,O=C(C1=CC=CS1)NNCCCC,N'-butylthiophene-2-carbohydrazide,,,903.9 ± 154.3,3461 ± 669.0
1g,O=C(C1=CC=CO1)NNCCCC,N'-butylfuran-2-carbohydrazide,,,5001 ± 372.5,">10,000"
1h,O=C(CCC1=CC=CC=C1)NNCCCC,N'-butyl-3-phenylpropanehydrazide,,,1892 ± 227.3,">10,000"
1i,O=C(/C=C/C1=CC=CC=C1)NNCCCC,N'-butylcinnamohydrazide,,,294.5 ± 32.64,1440 ± 86.09
1j,O=C(C1=C(C=CC=C2)C2=CC=C1)NNCCCC,N'-butyl-1-naphthohydrazide,,,">10,000",">10,000"
1k,O=C(C1=CC(C=CC=C2)=C2C=C1)NNCCCC,N'-butyl-2-naphthohydrazide,,,892.0 ± 72.47,2844 ± 948.0
1l,O=C(C1=CC=C(CNC(C2=CC=CC=C2)=O)C=C1)NNCCCC,N-(4-(2-butylhydrazine-1-carbonyl)benzyl)benzamide,18.87 ± 2.74,65.19 ± 10.41,8.56 ± 2.06,260.6 ± 8.68
2a,O=C(NNC/C=C/C)C1=CC=C(CNC(C2=CC=CC=C2)=O)C=C1,(E)-N-(4-(2-(but-2-en-1-yl)hydrazine-1-carbonyl)benzyl)benzamide,,,1533 ± 227.5,">10,000"
2b,O=C(NNC(C)C)C1=CC=C(CNC(C2=CC=CC=C2)=O)C=C1,N-(4-(2-isopropylhydrazine-1-carbonyl)benzyl)benzamide,,,">10,000",">10,000"
2c,O=C(N/N=C/CC)C1=CC=C(CNC(C2=CC=CC=C2)=O)C=C1,(E)-N-(4-(2-propylidenehydrazine-1-carbonyl)benzyl)benzamide,,,">10,000",">10,000"
2d,O=C(NNCCC)C1=CC=C(CNC(C2=CC=CC=C2)=O)C=C1,N-(4-(2-propylhydrazine-1-carbonyl)benzyl)benzamide,13.16 ± 2.01,77.59 ± 9.52,3.47 ± 0.48,155.3 ± 27.64
2e,O=C(NNCCCCC)C1=CC=C(CNC(C2=CC=CC=C2)=O)C=C1,N-(4-(2-pentylhydrazine-1-carbonyl)benzyl)benzamide,20.20 ± 5.04,43.65 ± 33.16,18.74 ± 4.3,263.6 ± 28.52
2f,O=C(NNCCC(F)(F)F)C1=CC=C(CNC(C2=CC=CC=C2)=O)C=C1,"N-(4-(2-(3,3,3-trifluoropropyl)hydrazine-1-carbonyl)benzyl)benzamide",,,69.10 ± 0.52,1229 ± 136.5
2g,O=C(NNCC1CC1)C2=CC=C(CNC(C3=CC=CC=C3)=O)C=C2,N-(4-(2-(cyclopropylmethyl)hydrazine-1-carbonyl)benzyl)benzamide,,,39.93 ± 0.25,1621 ± 196
2h,O=C(NNCCCCCCC)C1=CC=C(CNC(C2=CC=CC=C2)=O)C=C1,N-(4-(2-heptylhydrazine-1-carbonyl)benzyl)benzamide,,,568.7 ± 84.9,2161 ± 895.5
2i,O=C(NNCCCCCCCC)C1=CC=C(CNC(C2=CC=CC=C2)=O)C=C1,N-(4-(2-octylhydrazine-1-carbonyl)benzyl)benzamide,,,1093 ± 334.4,">10,000"
2j,O=C(NNCCCCCC)C1=CC=C(CNC(C2=CC=CC=C2)=O)C=C1,N-(4-(2-hexylhydrazine-1-carbonyl)benzyl)benzamide,,,184.1 ± 74.54,550.2 ± 133.9
2k,O=C(NNCCCCCCCCCC)C1=CC=C(CNC(C2=CC=CC=C2)=O)C=C1,N-(4-(2-decylhydrazine-1-carbonyl)benzyl)benzamide,,,">10,000",">10,000"
2l,O=C(NNCC)C1=CC=C(CNC(C2=CC=CC=C2)=O)C=C1,N-(4-(2-ethylhydrazine-1-carbonyl)benzyl)benzamide,,,187.3 ± 0.6,427.1 ± 110.5
2m,O=C(NNCC1CCC1)C2=CC=C(CNC(C3=CC=CC=C3)=O)C=C2,N-(4-(2-(cyclobutylmethyl)hydrazine-1-carbonyl)benzyl)benzamide,,,84.44 ± 7.22,1883 ± 212.4
3a,O=C(NNCC)C1=CC=C(CNC(/C=C/C2=CC=CC=C2)=O)C=C1,N-(4-(2-ethylhydrazine-1-carbonyl)benzyl)cinnamamide,29.49 ± 10.71,76.57 ± 9.74,19.71 ± 1.41,171.1 ± 34.23
3b,O=C(NNCCC)C1=CC=C(CNC(/C=C/C2=CC=CC=C2)=O)C=C1,N-(4-(2-propylhydrazine-1-carbonyl)benzyl)cinnamamide,11.81 ± 4.16,95.45 ± 34.15,0.95 ± 0.19,124.4 ± 14.02
3c,O=C(NNCCCC)C1=CC=C(CNC(/C=C/C2=CC=CC=C2)=O)C=C1,N-(4-(2-butylhydrazine-1-carbonyl)benzyl)cinnamamide,60.17 ± 20.97,70.03 ± 26.38,3.67 ± 2.86,494.3 ± 209.6
3d,O=C(NNCCCCC)C1=CC=C(CNC(/C=C/C2=CC=CC=C2)=O)C=C1,N-(4-(2-pentylhydrazine-1-carbonyl)benzyl)cinnamamide,47.36 ± 16.79,99.56 ± 17.44,32.55 ± 1.15,690.7 ± 54.67
3e,O=C(NNCCCCCC)C1=CC=C(CNC(/C=C/C2=CC=CC=C2)=O)C=C1,N-(4-(2-hexylhydrazine-1-carbonyl)benzyl)cinnamamide,81.36 ± 11.96,139.2 ± 29.9,149.8 ± 81.63,1718 ± 139.1
